# Supplementary material for: Cisplatin and transplatin interaction with methionine: bonding motifs assayed by vibrational spectroscopy in the isolated ionic complexes
Source: Royal Society of Chemistry journal article supplement (doi:10.1039/c7cp05203k), 2017-01-01
Supplement: c7cp05203k1.pdf [file c7cp05203k1.pdf]

## Electronic Supplementary Information

### Cisplatin and transplatin interaction with methionine: bonding motifs assayed by vibrational spectroscopy in the isolated ionic complexes

Roberto Paciotti<sup>b</sup>, Davide Corinti<sup>a</sup>, Alberto De Petris<sup>a,b</sup>, Alessandra Ciavardini<sup>a,c</sup>, Susanna Piccirillo<sup>d</sup>, Cecilia Coletti<sup>b</sup>, Nazzareno Re<sup>b</sup>, Philippe Maitre<sup>e</sup>, Bruno Bellina<sup>f</sup>, Perdita Barran<sup>f</sup>, Barbara Chiavarino<sup>a</sup>, Maria Elisa Crestoni<sup>a</sup> and Simonetta Fornarini<sup>\*a</sup>

<sup>a</sup> Dipartimento di Chimica e Tecnologie del Farmaco, Università di Roma "La Sapienza", I-00185 Roma, Italy

<sup>b</sup> Dipartimento di Farmacia, Università G. D'Annunzio, I-66100 Chieti, Italy

<sup>c</sup> Present address: Synchrotron SOLEIL Saint-Aubin - 91192 France

<sup>d</sup> Dipartimento di Scienze e Tecnologie Chimiche, Università di Roma "Tor Vergata", I-00133 Roma, Italy

<sup>e</sup> Laboratoire de Chimie Physique, Université Paris-Sud, UMR 8000 CNRS, 91405 Orsay, France

<sup>f</sup> Manchester Institute of Biotechnology, University of Manchester, Manchester, M1 7DN, UK

#### Contents:

|                                                                                                                                                                                                                           |           |
|---------------------------------------------------------------------------------------------------------------------------------------------------------------------------------------------------------------------------|-----------|
| Complete reference [70].....                                                                                                                                                                                              | p.S2      |
| Figure S1. Mass spectrum of a solution of cisplatin and methionine.....                                                                                                                                                   | p.S3      |
| Figure S2. Mass spectrum of a solution of transplatin and methionine.....                                                                                                                                                 | p.S3      |
| Figure S3. Mobility profile of <i>cis</i> - and <i>trans</i> -[PtCl(NH <sub>3</sub> ) <sub>2</sub> (Met)] <sup>+</sup> .....                                                                                              | p.S4      |
| Figure S4. Mass spectra recorded upon selection of <i>cis</i> -[PtCl(NH <sub>3</sub> ) <sub>2</sub> (Met)] <sup>+</sup> before and after laser irradiation.....                                                           | p.S5      |
| Figure S5. Mass spectra recorded upon selection of <i>trans</i> -[PtCl(NH <sub>3</sub> ) <sub>2</sub> (Met)] <sup>+</sup> before and after laser irradiation.....                                                         | p.S5      |
| Figure S6. Optimized geometries for the most stable conformers of <i>cis</i> -[PtCl(NH <sub>3</sub> ) <sub>2</sub> Met] <sup>+</sup> .....                                                                                | p.S6-S7   |
| Figure S7. Optimized geometries for the most stable conformers of <i>trans</i> -[PtCl(NH <sub>3</sub> ) <sub>2</sub> Met] <sup>+</sup> .....                                                                              | p.S8      |
| Figure S8. Calculated IR spectra for <i>cis</i> -[PtCl(NH <sub>3</sub> ) <sub>2</sub> Met] <sup>+</sup> isomers.....                                                                                                      | p.S9-S10  |
| Figure S9. Calculated IR spectra for <i>trans</i> -[PtCl(NH <sub>3</sub> ) <sub>2</sub> Met] <sup>+</sup> isomers.....                                                                                                    | p.S11     |
| Table S1. Selected vibrational transitions observed for <i>cis</i> -[PtCl(NH <sub>3</sub> ) <sub>2</sub> (Met)] <sup>+</sup> in the IRMPD spectra compared with anharmonic frequencies along with mode assignments.....   | p.S12     |
| Table S2. Selected vibrational transitions observed for <i>trans</i> -[PtCl(NH <sub>3</sub> ) <sub>2</sub> (Met)] <sup>+</sup> in the IRMPD spectra compared with anharmonic frequencies along with mode assignments..... | p.S13-S14 |

Table S3. Theoretically calculated thermodynamic parameters for the most stable structures of sampled  $[\text{PtCl}(\text{NH}_3)_2\text{Met}]^+$  complexes.....p.S15

Complete reference [70]

M. J. Frisch, G. W. Trucks, H. B. Schlegel, G. E. Scuseria, M. A. Robb, J. R. Cheeseman, G. Scalmani, V. Barone, B. Mennucci, G. A. Petersson, H. Nakatsuji, M. Caricato, X. Li, H. P. Hratchian, A. F. Izmaylov, J. Bloino, G. Zheng, J. L. Sonnenberg, M. Hada, M. Ehara, K. Toyota, R. Fukuda, J. Hasegawa, M. Ishida, T. Nakajima, Y. Honda, O. Kitao, H. Nakai, T. Vreven, J. A. Montgomery, Jr., J. E. Peralta, F. Ogliaro, M. Bearpark, J. J. Heyd, E. Brothers, K. N. Kudin, V. N. Staroverov, R. Kobayashi, J. Normand, K. Raghavachari, A. Rendell, J. C. Burant, S. S. Iyengar, J. Tomasi, M. Cossi, N. Rega, J. M. Millam, M. Klene, J. E. Knox, J. B. Cross, V. Bakken, C. Adamo, J. Jaramillo, R. Gomperts, R. E. Stratmann, O. Yazyev, A. J. Austin, R. Cammi, C. Pomelli, J. W. Ochterski, R. L. Martin, K. Morokuma, V. G. Zakrzewski, G. A. Voth, P. Salvador, J. J. Dannenberg, S. Dapprich, A. D. Daniels, Ö. Farkas, J. B. Foresman, J. V. Ortiz, J. Cioslowski, D. J. Fox, Gaussian 09, Revision D.01, Gaussian, Inc., Wallingford CT, 2009.

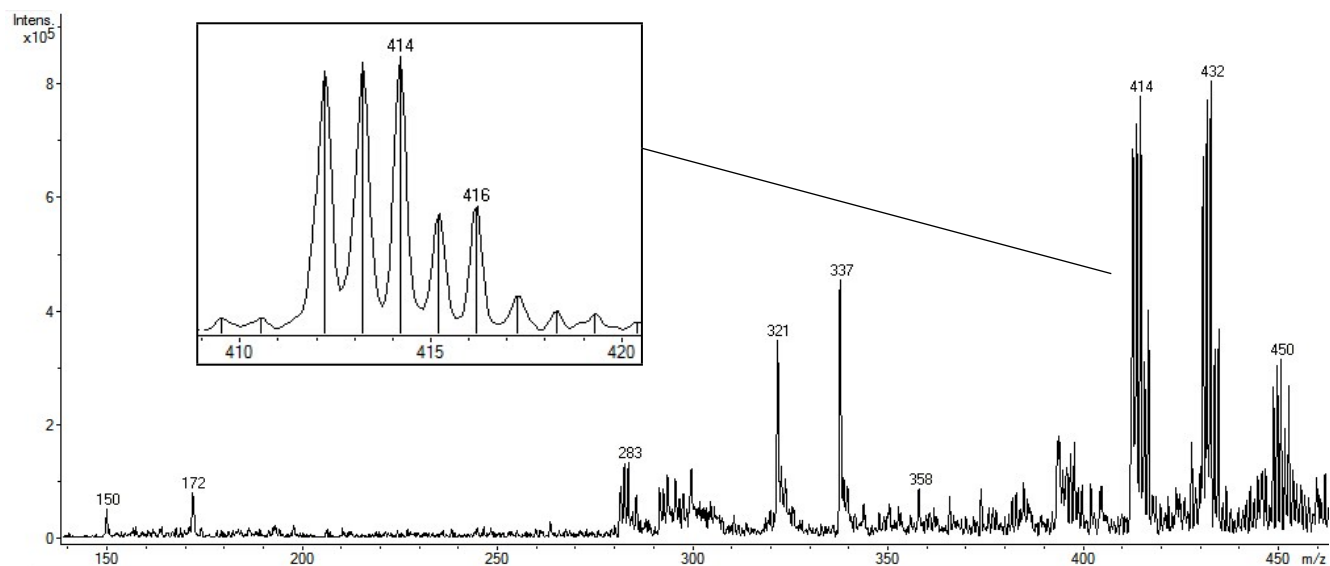

Figure S1. Mass spectrum of a solution of cisplatin and methionine (1:1)  $5 \times 10^{-5}$  M in methanol/water (50/50, v/v) recorded with an Esquire 6000 ion trap mass spectrometer. The species of interest, the *cis*-[PtCl(NH<sub>3</sub>)<sub>2</sub>Met]<sup>+</sup> complex, corresponds to the cluster at *m/z* 412-416 and is highlighted in the inset. The signals at *m/z* 150, 172, 321, 337 are related to Met (e. g. *m/z* 150 is protonated Met) while other signals belong to hydrolyzed cisplatin (e. g. *m/z* 281-285 is the *cis*-[PtCl(NH<sub>3</sub>)<sub>2</sub>(H<sub>2</sub>O)]<sup>+</sup> complex) and other Pt complexes. The ion at *m/z* 430-434 formally corresponds to a five-ligand complex, namely [PtCl(NH<sub>3</sub>)<sub>2</sub>Met(H<sub>2</sub>O)]<sup>+</sup>.

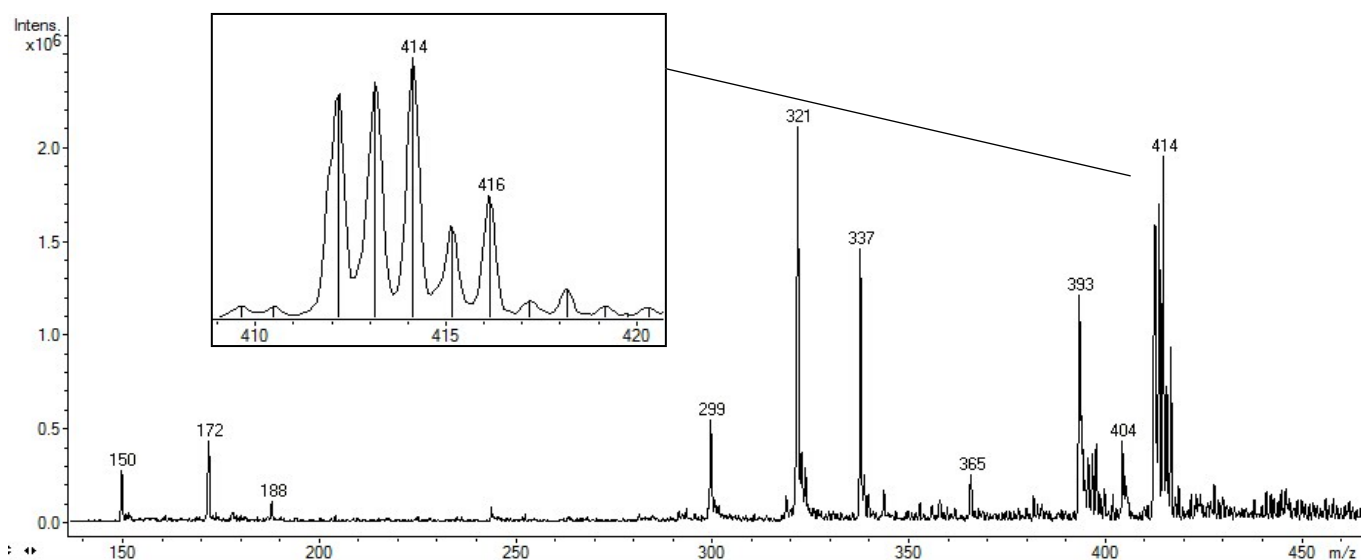

Figure S2. Mass spectrum of a solution of transplatin and methionine (1:1)  $5 \times 10^{-5}$  M in methanol/water (50/50, v/v) recorded with an Esquire 6000 ion trap mass spectrometer. The species of interest, the *trans*-[PtCl(NH<sub>3</sub>)<sub>2</sub>Met]<sup>+</sup> complex, corresponds to the cluster at *m/z* 412-416 and is highlighted in the inset. The signals at *m/z* 150, 172, 188, 321, 337 are related to Met (e. g. *m/z* 150 is protonated Met).

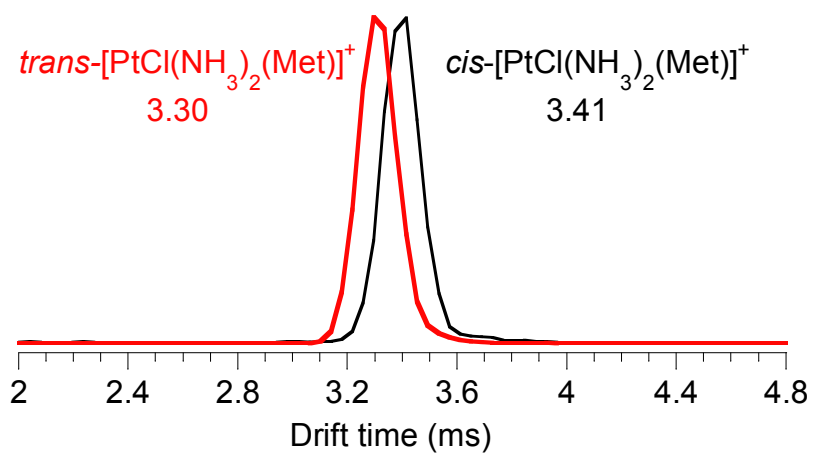

Figure S3. Mobility profile of *cis*- (black profile) and *trans*- (red profile) [PtCl(NH<sub>3</sub>)<sub>2</sub>(Met)]<sup>+</sup>. The arrival time of the two species is reported in the figure.

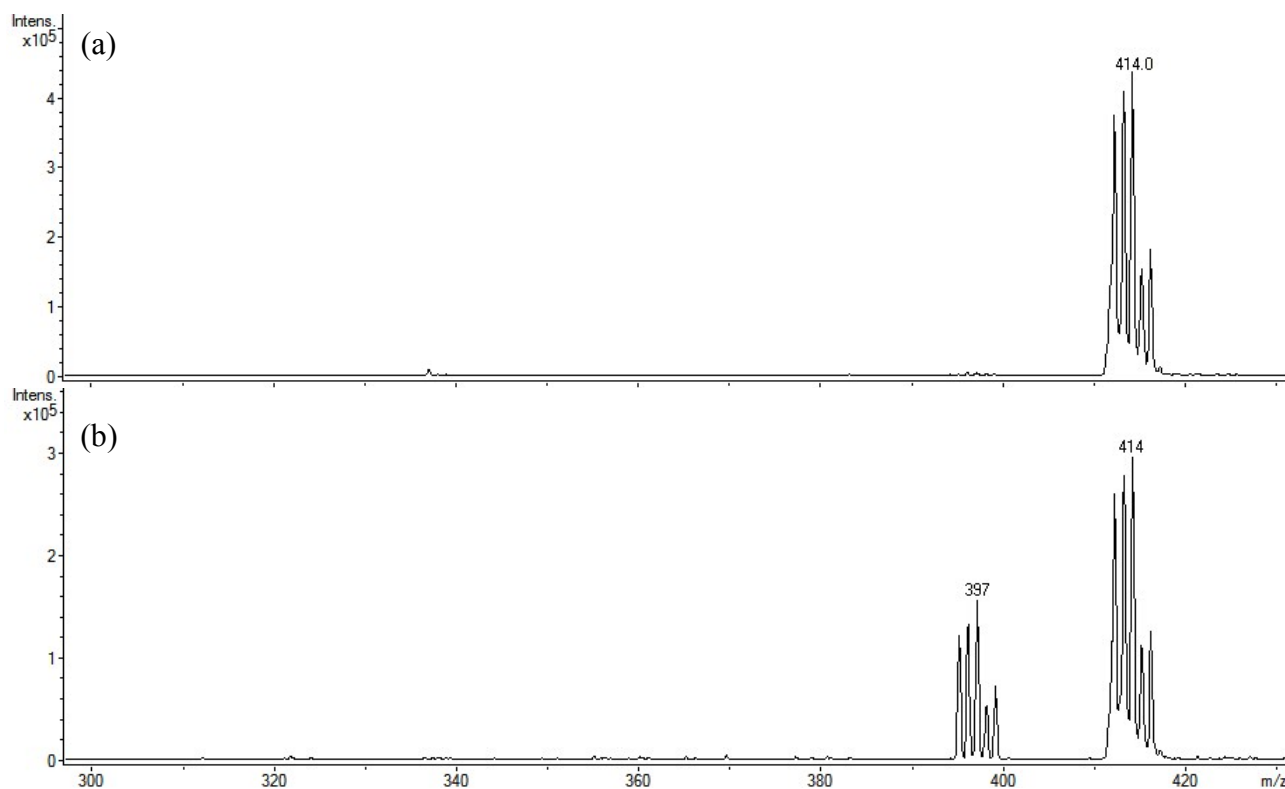

Figure S4. Mass spectra recorded upon selection of *cis*-[PtCl(NH<sub>3</sub>)<sub>2</sub>(Met)]<sup>+</sup> (*m/z* 412-416), in a Paul ion trap mass spectrometer (Bruker, Esquire 6000), before (a) and after (b) irradiation at 3570 cm<sup>-1</sup>. The photofragmentation product by loss of NH<sub>3</sub> is observed at *m/z* 395-399.

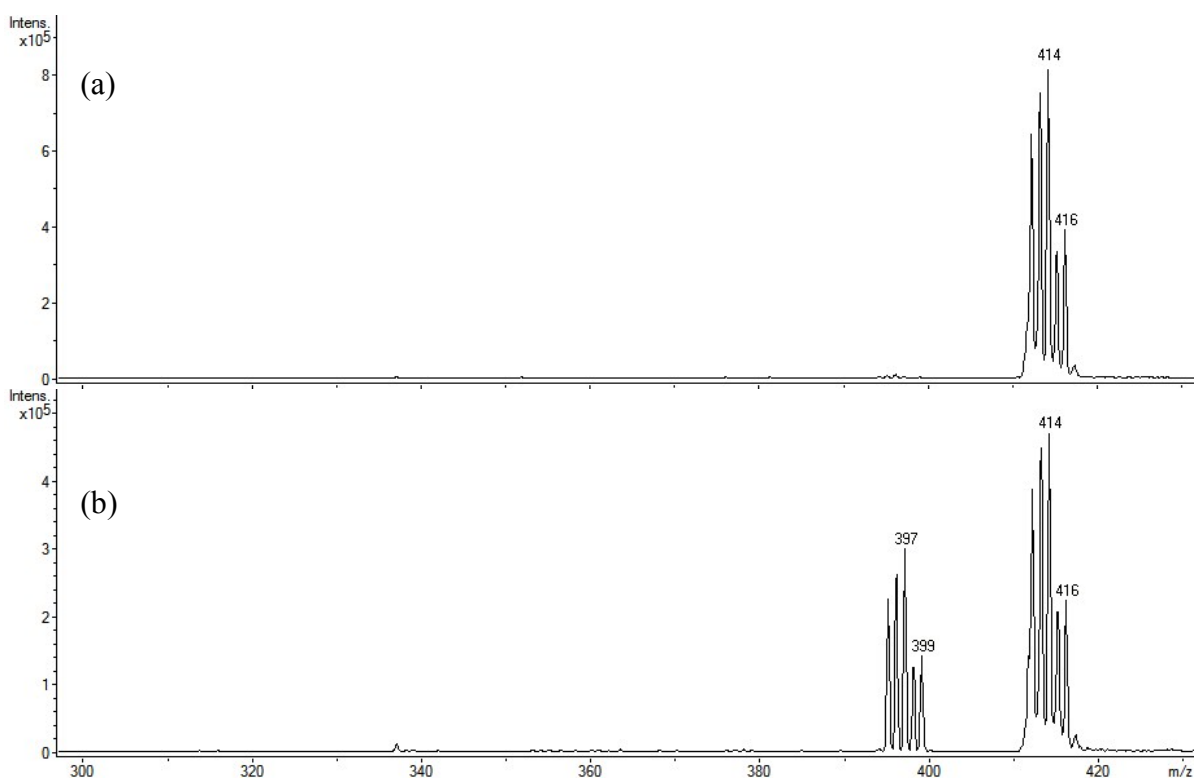

Figure S5. Mass spectra recorded upon selection of *trans*-[PtCl(NH<sub>3</sub>)<sub>2</sub>(Met)]<sup>+</sup> (*m/z* 412-416), in a Paul ion trap mass spectrometer (Bruker, Esquire 6000), before (a) and after (b) irradiation at 3570 cm<sup>-1</sup>. The photofragmentation product by loss of NH<sub>3</sub> is observed at *m/z* 395-399.

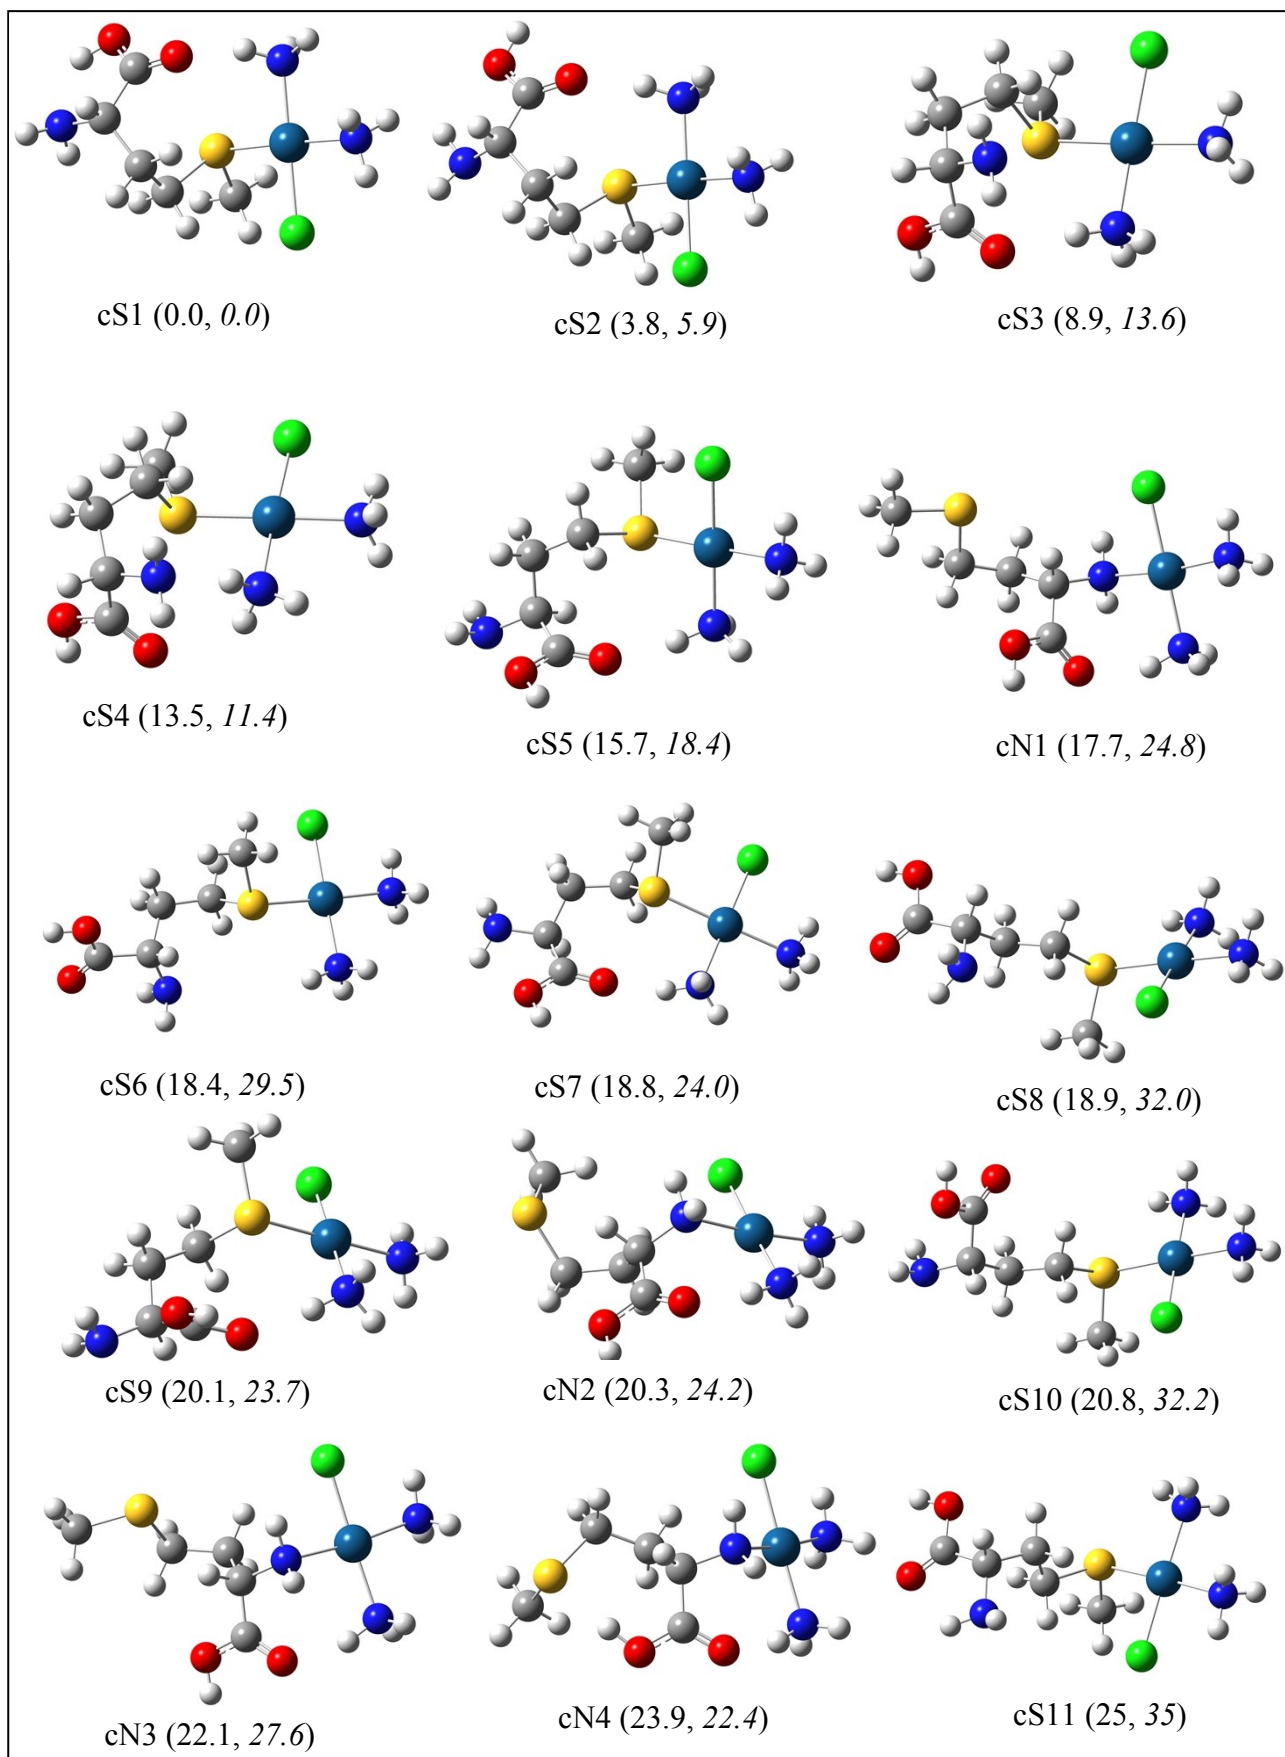

Figure S6. Optimized geometries for the most stable conformers of *cis*-[PtCl(NH<sub>3</sub>)<sub>2</sub>Met]<sup>+</sup> involving platination of the amino acid at either thioether sulfur or amino nitrogen or (one example) carbonyl oxygen.

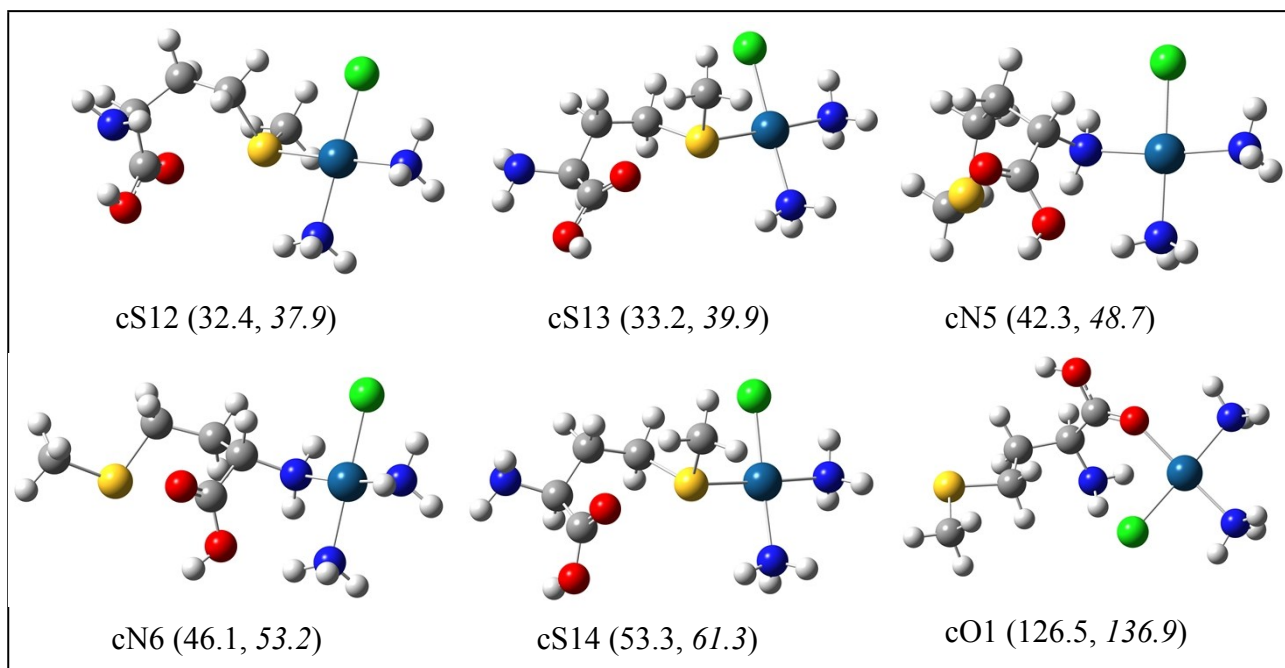

Figure S6 (continuation). Optimized geometries for the most stable conformers of *cis*-[PtCl(NH<sub>3</sub>)<sub>2</sub>Met]<sup>+</sup> involving platination of the amino acid at either thioether sulfur or amino nitrogen or (one example) carbonyl oxygen.

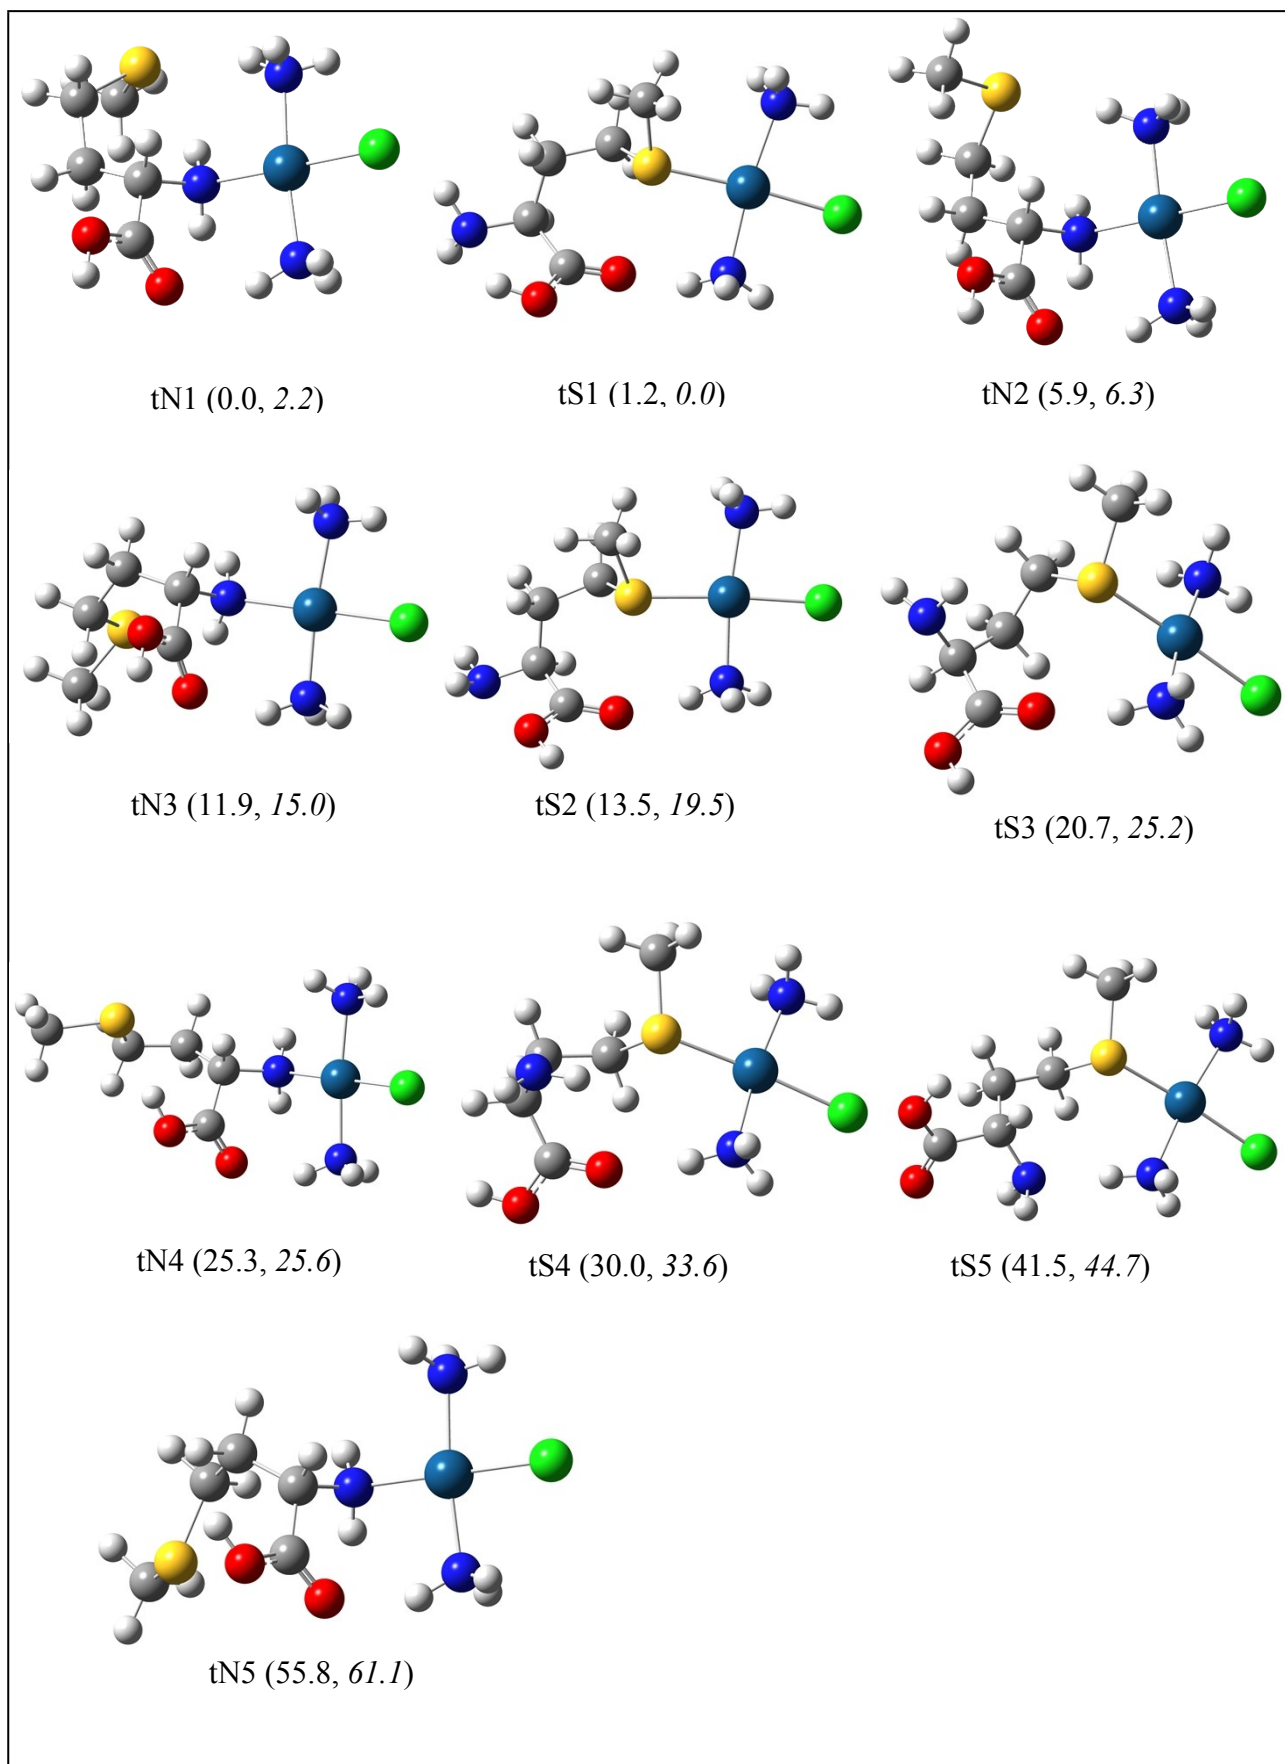

Figure S7. Optimized geometries for the most stable conformers of *trans*-[PtCl(NH<sub>3</sub>)<sub>2</sub>Met]<sup>+</sup> involving platination of the amino acid at either thioether sulfur or amino nitrogen.



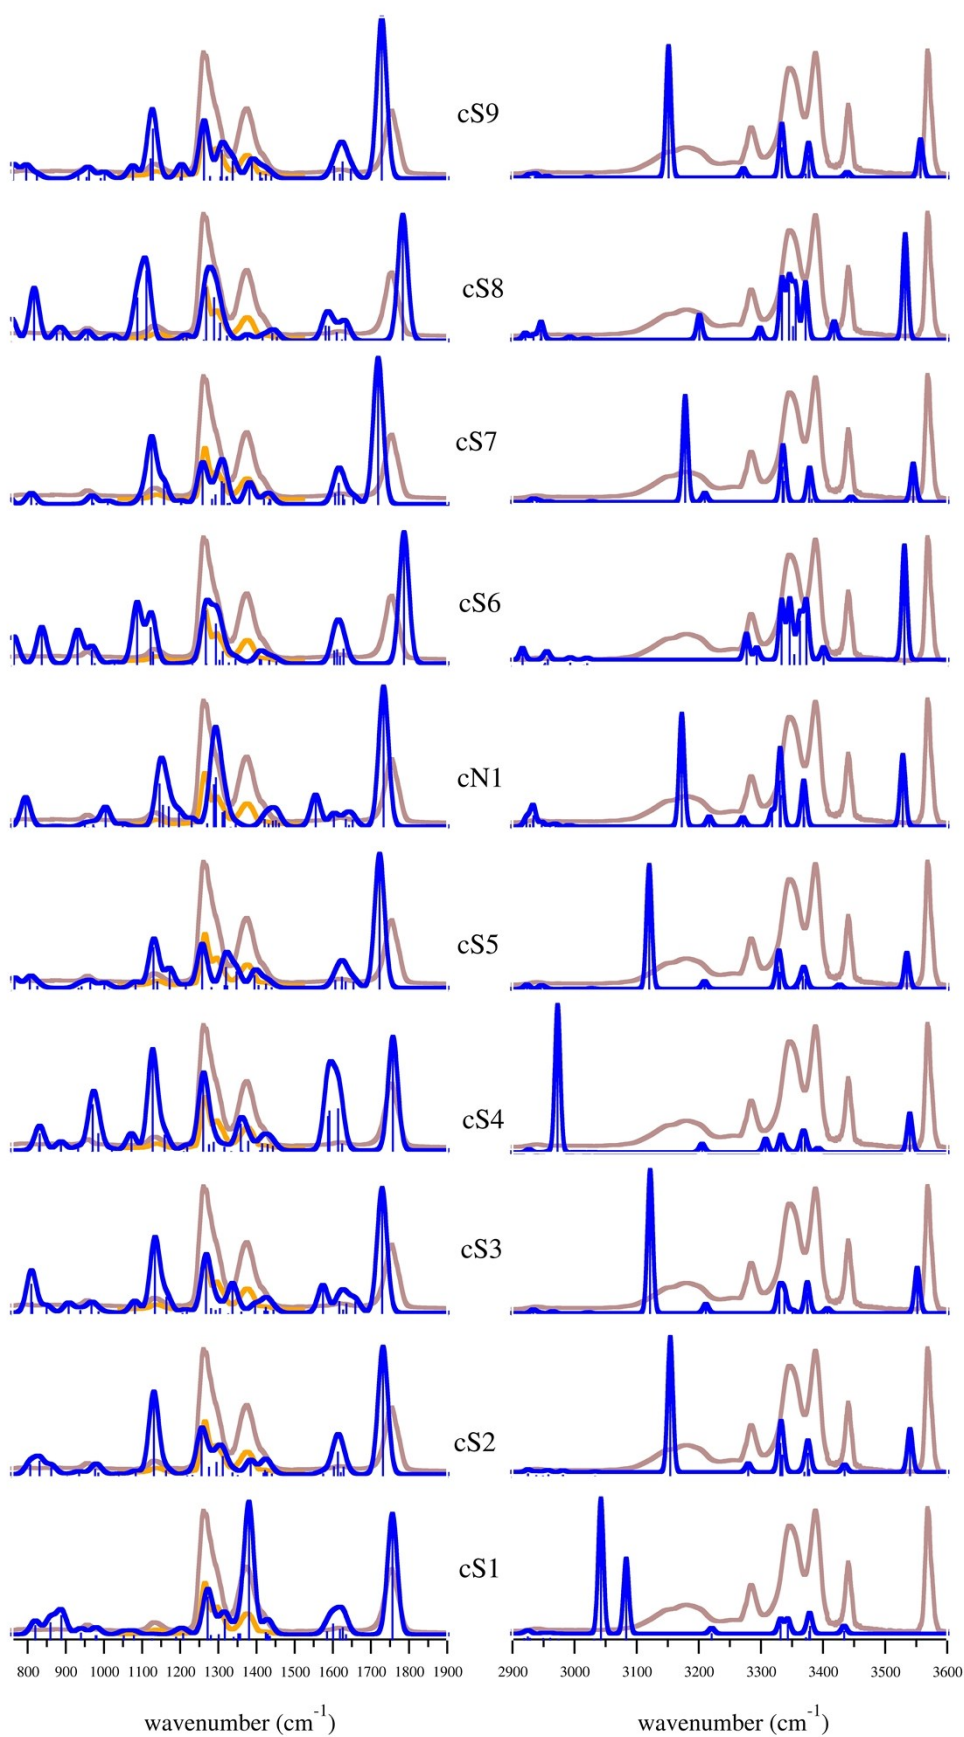

Figure S8. Calculated IR spectra for *cis*-[PtCl(NH<sub>3</sub>)<sub>2</sub>Met]<sup>+</sup> isomers. The experimental IRMPD spectrum is plotted in the background (in pale magenta).

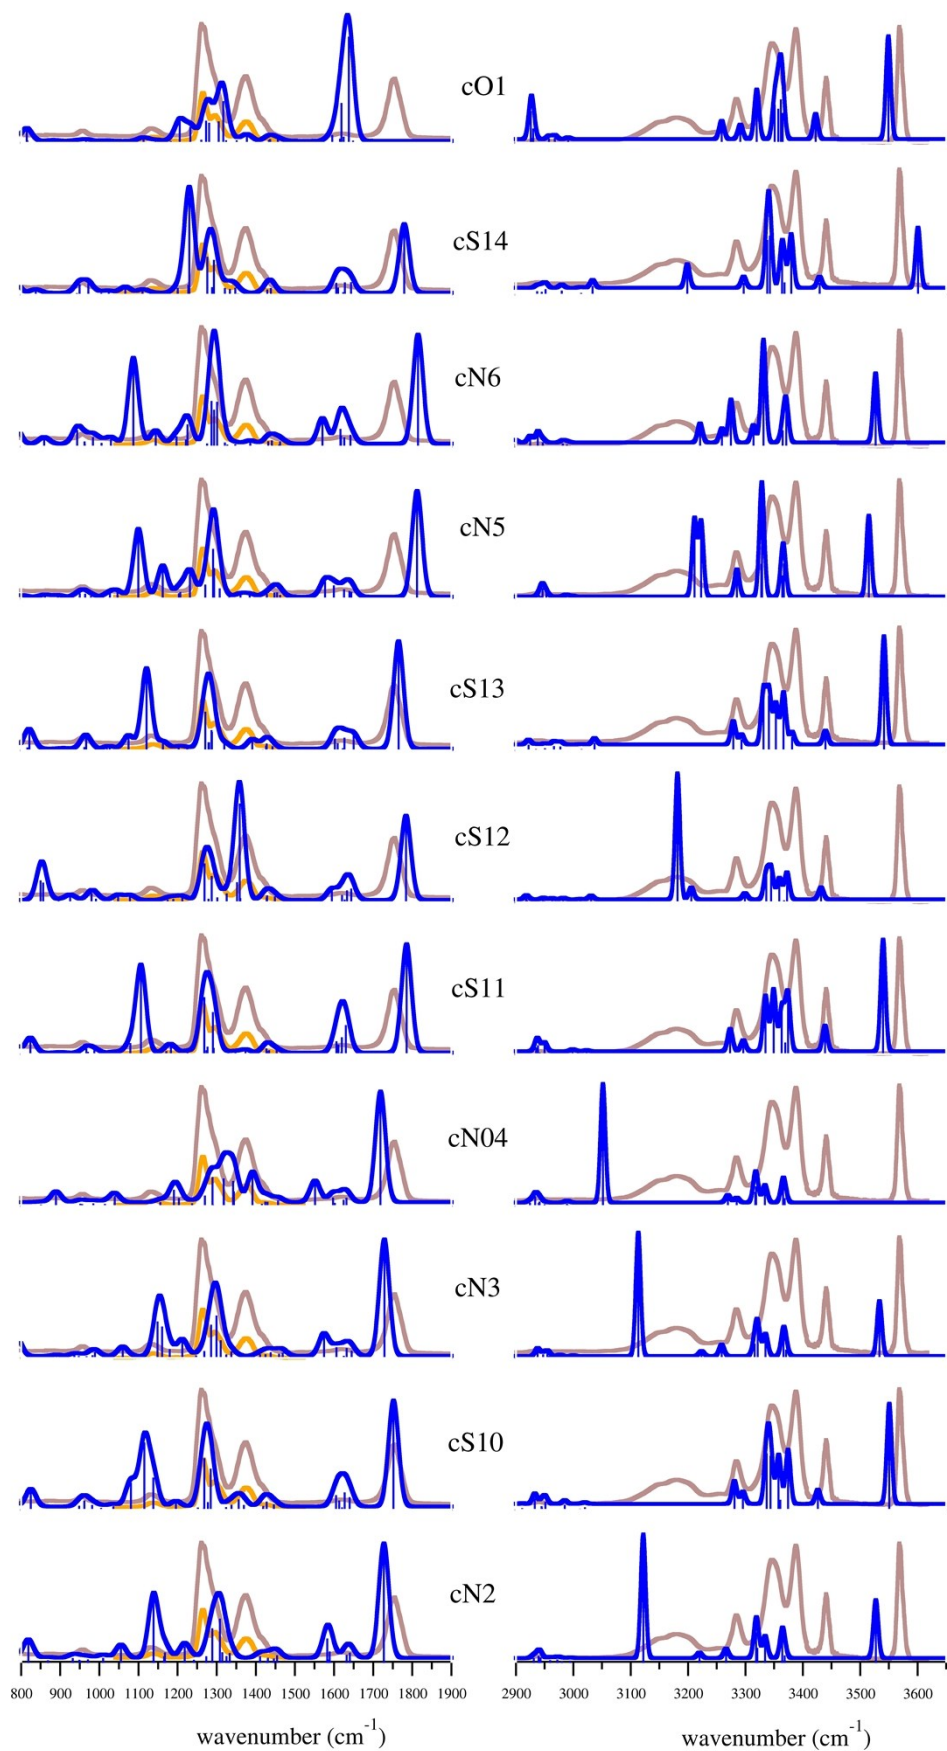

Figure S8. (continuation) Calculated IR spectra for *cis*-[PtCl(NH<sub>3</sub>)<sub>2</sub>Met]<sup>+</sup> isomers. The experimental IRMPD spectrum is plotted in the background (in pale magenta).

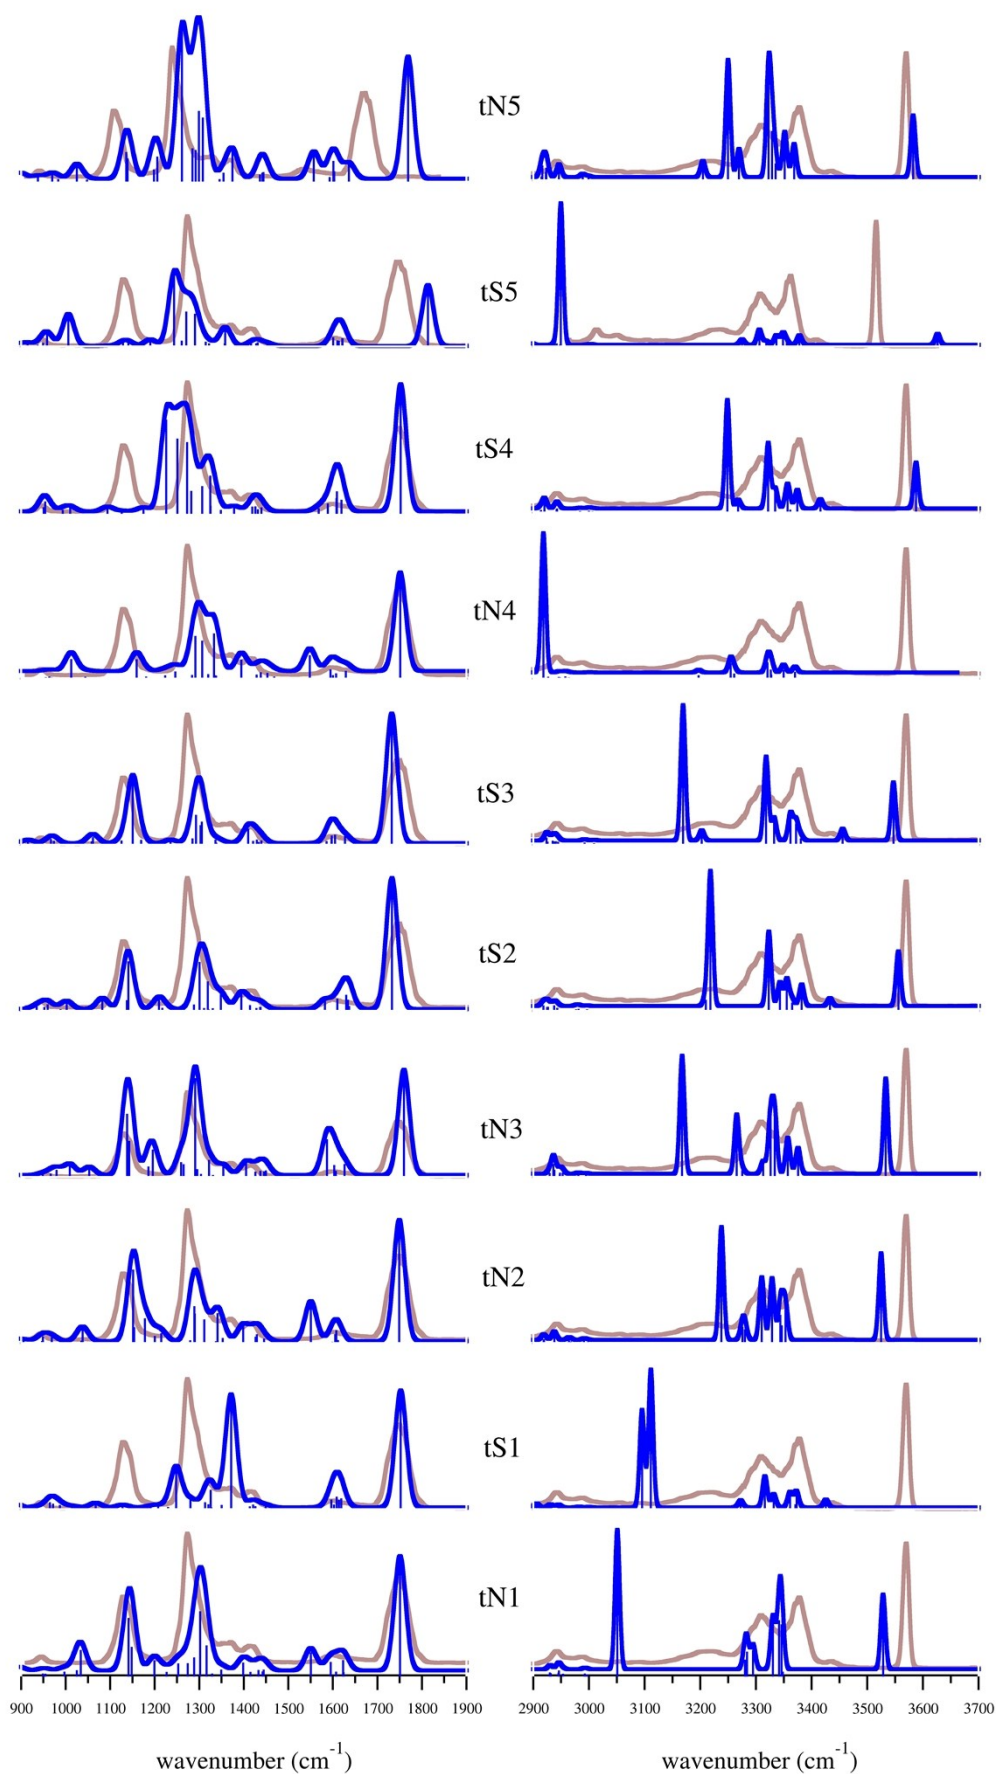

Figure S9. Calculated IR spectra for *trans*-[PtCl(NH<sub>3</sub>)<sub>2</sub>Met]<sup>+</sup> isomers. The experimental IRMPD spectrum is plotted in the background (in pale magenta).

Table S1. Selected vibrational transitions observed for *cis*-[PtCl(NH<sub>3</sub>)<sub>2</sub>(Met)]<sup>+</sup> in the IRMPD spectra compared with anharmonic frequencies calculated for representative isomers at the B3LYP/BS1 (BS1: 6311+G(2df,pd) for H, N, C and O; 6311+G(3df) for S; Pt:LANL2TZ-f) level, along with mode assignments.

| $\nu_{\text{exp}}^{\text{a}}$ | $\nu_{\text{calc}}(\text{CS1})^{\text{a,b}}$ | $\nu_{\text{calc}}(\text{CS2})^{\text{a,b}}$ | $\nu_{\text{calc}}(\text{CN1})^{\text{a,b}}$ | Mode assignment <sup>d</sup>                                                    |
|-------------------------------|----------------------------------------------|----------------------------------------------|----------------------------------------------|---------------------------------------------------------------------------------|
| -                             | 820 (42)                                     | 807 (37)                                     | -                                            | -NH <sub>3</sub> $\beta_{\text{t}}$                                             |
| -                             | 860 (51)                                     | 862 (28)                                     | -                                            | NH <sub>2</sub> $\beta_{\text{w}}$ , CH <sub>2</sub> -CH <sub>2</sub> $\sigma$  |
| -                             | 888 (73)                                     | -                                            | -                                            | O-H $\beta_{\text{w}}$                                                          |
| 955                           | -                                            | 977 (22)                                     | -                                            | CH <sub>3</sub> $\beta_{\text{t}}$                                              |
| -                             | -                                            | -                                            | 1004 (48)                                    | NH <sub>2</sub> -C $_{\alpha}$ $\sigma$ , molecular deformation                 |
| 1133                          | -                                            | 1131 (253)                                   | -                                            | O-H $\beta_{\text{s}}$ , NH <sub>2</sub> $\beta_{\text{t}}$                     |
| -                             | -                                            | -                                            | 1146 (108)                                   | O-H $\beta_{\text{s}}$ , C(=O)-OH $\sigma$ , CH <sub>2</sub> $\beta_{\text{w}}$ |
| -                             | -                                            | -                                            | 1155 (55)                                    | O-H $\beta_{\text{s}}$ , C(=O)-OH $\sigma$ , CH <sub>2</sub> $\beta_{\text{w}}$ |
| -                             | -                                            | -                                            | 1170 (52)                                    | NH <sub>2</sub> $\beta_{\text{w}}$ , CH <sub>2</sub> $\beta_{\text{w}}$         |
| -                             | -                                            | -                                            | 1196 (36)                                    | NH <sub>2</sub> $\beta_{\text{t}}$ , O-H $\beta_{\text{s}}$                     |
| 1260                          | 1272 (130)                                   | 1256 (133)                                   | 1288 (106)                                   | -NH <sub>3</sub> $\beta_{\text{u}}$                                             |
| -                             | -                                            | 1276 (30)                                    | -                                            | C $_{\alpha}$ -H $\beta$                                                        |
| 1294 (s) <sup>c</sup>         | -                                            | 1295 (44)                                    | -                                            | O-H $\beta_{\text{s}}$                                                          |
| -                             | 1317 (62)                                    | 1312 (62)                                    | 1294 (123)                                   | NH <sub>3</sub> $\beta_{\text{u}}$                                              |
| -                             | -                                            | -                                            | 1311 (37)                                    | CH <sub>3</sub> $\beta_{\text{u}}$                                              |
| -                             | -                                            | -                                            | 1316 (41)                                    | NH <sub>2</sub> $\beta_{\text{t}}$ , O-H $\beta_{\text{s}}$                     |
| 1376                          | 1380 (404)                                   | -                                            | -                                            | O-H $\beta_{\text{s}}$ , C(=O)-OH $\sigma$                                      |
| -                             | -                                            | 1384 (44)                                    | -                                            | C-OH $\sigma$ , NH <sub>2</sub> $\beta_{\text{t}}$ , molecular deformation      |
| 1426 (s) <sup>c</sup>         | 1424 (20)                                    | -                                            | -                                            | C $_{\beta}$ H <sub>2</sub> $\beta_{\text{s}}$                                  |
| -                             | -                                            | -                                            | 1555 (78)                                    | NH <sub>2</sub> $\beta_{\text{s}}$                                              |
| 1616                          | 1585 (24)                                    | 1603 (30)                                    | 1603 (32)                                    | NH <sub>3</sub> $\beta_{\text{s}}$                                              |
| -                             | 1601 (47)                                    | 1614 (76)                                    | -                                            | NH <sub>2</sub> $\beta_{\text{s}}$                                              |
| -                             | 1626 (36)                                    | 1628 (29)                                    | 1634 (20)                                    | NH <sub>3</sub> $\beta_{\text{s}}$                                              |
| 1754                          | 1756 (372)                                   | 1732 (393)                                   | 1733 (345)                                   | C=O $\sigma$                                                                    |
| 2942                          | -                                            | -                                            | 2934 (23)                                    | CH <sub>3</sub> $\sigma_{\text{s}}$                                             |
| 3148-3184<br>(3113-3225)      | 3042 (500)                                   | 3154 (333)                                   | -                                            | NH <sub>3</sub> $\sigma_{\text{s}}$                                             |
| -                             | 3083 (278)                                   | -                                            | -                                            | O-H $\sigma$                                                                    |
| -                             | 3221 (21)                                    | -                                            | 3173 (208)                                   | NH <sub>3</sub> $\sigma_{\text{s}}$                                             |
| 3255                          | -                                            | -                                            | -                                            |                                                                                 |
| 3284                          | -                                            | 3280 (21)                                    | -                                            | NH <sub>3</sub> $\sigma_{\text{s}}$                                             |
| -                             | -                                            | -                                            | 3318 (29)                                    | NH <sub>2</sub> $\sigma_{\text{a}}$                                             |
| 3347                          | -                                            | 3331 (82)                                    | 3330 (87)                                    | NH <sub>3</sub> $\sigma_{\text{a}}$                                             |
| -                             | 3332 (55)                                    | -                                            | -                                            | NH <sub>3</sub> $\sigma_{\text{s}}$                                             |
| -                             | 3343 (55)                                    | 3335 (55)                                    | 3332 (60)                                    | NH <sub>3</sub> $\sigma_{\text{a}}$                                             |
| 3386                          | 3378 (29)                                    | 3376 (58)                                    | 3369 (65)                                    | NH <sub>3</sub> $\sigma_{\text{a}}$                                             |
| -                             | 3379 (47)                                    | -                                            | -                                            | NH <sub>3</sub> $\sigma_{\text{a}}$                                             |
| -                             | -                                            | 3280 (21)                                    | -                                            | NH <sub>3</sub> $\sigma_{\text{s}}$                                             |
| 3443                          | 3434 (29)                                    | 3435 (19)                                    | -                                            | NH <sub>2</sub> $\sigma_{\text{a}}$                                             |
| 3564                          | -                                            | 3540 (106)                                   | 3528 (132)                                   | O-H $\sigma$                                                                    |

<sup>a</sup> Wavenumbers in cm<sup>-1</sup>.

<sup>b</sup> Calculated harmonic IR intensities are given in parentheses (km mol<sup>-1</sup>). Transitions with intensity lower than 20 km mol<sup>-1</sup> are (usually) not reported. Frequencies (anharmonic) are not scaled.

<sup>c</sup> s, shoulder.

<sup>d</sup>  $\sigma$  = stretching mode;  $\sigma_{\text{a}}$  = asymmetric stretching;  $\sigma_{\text{s}}$  = symmetric stretching;  $\beta$  = bending mode;  $\beta_{\text{s}}$  = scissoring (symmetric bending in plane);  $\beta_{\text{w}}$  = wagging (symmetric bending out of plane),  $\beta_{\text{t}}$  = twisting (asymmetric bending out of plane).

Table S2. Selected vibrational transitions observed for *trans*-[PtCl(NH<sub>3</sub>)<sub>2</sub>(Met)]<sup>+</sup> in the IRMPD spectra compared with anharmonic frequencies calculated for representative isomers at the B3LYP/BS1 (BS1: 6311+G(2df,pd) for H, N, C and O; 6311+G(3df) for S; Pt:LANL2TZ-f) level, along with mode assignments.

| $\nu_{\text{exp}}^a$     | $\nu_{\text{calc}}(\text{tN1})^{a,b}$ | $\nu_{\text{calc}}(\text{tS1})^{a,b}$ | $\nu_{\text{calc}}(\text{tN2})^{a,b}$ | $\nu_{\text{calc}}(\text{tS2})^{a,b}$ | Mode assignment <sup>d</sup>                                                                                                  |
|--------------------------|---------------------------------------|---------------------------------------|---------------------------------------|---------------------------------------|-------------------------------------------------------------------------------------------------------------------------------|
| -                        | 842 (55)                              | 830 (76),<br>863 (83)<br>878 (34)     | 844 (49)                              | -                                     | NH <sub>3</sub> $\beta_w$<br>O-H $\beta_w$<br>NH <sub>3</sub> $\beta_w$                                                       |
| 944                      | -                                     | 965 (22)                              | -                                     | -                                     | CH <sub>3</sub> $\beta_w$                                                                                                     |
| -                        | 1034 (60)                             | -                                     | 1038 (32)                             | -                                     | NH <sub>2</sub> -C $\sigma$ , C $_{\alpha}$ -C(=O) $\sigma$                                                                   |
| -                        | -                                     | -                                     | -                                     | 1082 (34)                             | C $_{\alpha}$ -NH <sub>2</sub> $\sigma$ , NH <sub>2</sub> $\beta_t$ , C $_{\alpha}$ -H                                        |
| 1130                     | 1141 (137)                            | -                                     | 1152 (175)                            | 1141 (146)                            | O-H $\beta_s$ , C(=O)-OH $\sigma$                                                                                             |
| -                        | 1148 (67)                             | -                                     | 1154 (36)                             | 1138 (29)                             | NH <sub>2</sub> $\beta_w$ , C $_{\beta}$ H <sub>2</sub> $\beta_t$ , C $_{\gamma}$ H <sub>2</sub> $\beta_t$                    |
| -                        | 1199 (35)                             | -                                     | 1178 (57)                             | 1210 (32)                             | NH <sub>2</sub> $\beta_t$ , O-H $\beta_s$ , C $_{\beta}$ H <sub>2</sub> $\beta_t$ ,<br>C $_{\gamma}$ H <sub>2</sub> $\beta_t$ |
| 1275                     | 1253 (27)                             | 1280 (30)                             | -                                     | -                                     | NH <sub>2</sub> $\beta_t$ , CH <sub>2</sub> $\beta$                                                                           |
| -                        | 1274 (28)                             | -                                     | -                                     | -                                     | NH <sub>2</sub> $\beta_t$ , CH <sub>2</sub> $\beta$                                                                           |
| -                        | 1289 (42)                             | 1248 (147)                            | 1312 (55)                             | 1301 (144)                            | NH <sub>3</sub> $\beta_u$                                                                                                     |
| -                        | 1302 (153)                            | 1326 (67)                             | 1290 (69)                             | 1319 (86)                             | NH <sub>3</sub> $\beta_u$                                                                                                     |
| -                        | 1316 (71)                             | 1313 (22)                             | -                                     | -                                     | N-H $\beta$ , C-H $\beta$ , O-H $\beta_s$                                                                                     |
| 1356-1372                | -                                     | 1372 (405)                            | 1341 (70)                             | 1394 (48)                             | O-H $\beta_s$ , C(=O)-OH $\sigma$ , C $_{\alpha}$ -H $\beta$                                                                  |
| 1416                     | 1399 (30)                             | -                                     | -                                     | -                                     | O-H $\beta_s$ , NH <sub>2</sub> $\beta_t$ , C $_{\beta}$ H <sub>2</sub> $\beta_t$                                             |
| -                        | -                                     | -                                     | 1399 (40)                             | -                                     | C $_{\alpha}$ -COOH $\sigma$ , C $_{\alpha}$ -H $\beta$ , NH <sub>2</sub> $\beta_t$                                           |
| -                        | 1550 (54)                             | 1609 (42)                             | 1551 (96)                             | 1630 (45)                             | NH <sub>2</sub> $\beta_s$                                                                                                     |
| 1600                     | 1595 (31)                             | 1596 (32)                             | -                                     | 1610 (34) / 1634<br>(30)              | NH <sub>3</sub> $\beta_s$                                                                                                     |
| -                        | 1623 (35)                             | 1614<br>(30) / 1619<br>(36)           | 1608 (29)                             | 1582 (29)                             | NH <sub>3</sub> $\beta_s$                                                                                                     |
| 1745                     | 1751 (275)                            | 1752 (414)                            | 1749 (292)                            | 1733 (394)                            | C=O $\sigma$                                                                                                                  |
| 2942                     | -                                     | -                                     | -                                     | -                                     | C-H $\sigma_s$                                                                                                                |
| 2988                     | -                                     | -                                     | -                                     | -                                     | C-H $\sigma_a$                                                                                                                |
| 3055                     | 3051 (294)                            | -                                     | -                                     | -                                     | N(H <sub>2</sub> )-H $\sigma$                                                                                                 |
| -                        | -                                     | 3095 (293)                            | -                                     | -                                     | O-H $\sigma$                                                                                                                  |
| 3202-3226<br>(3155-3250) | -                                     | 3111 (414)                            | -                                     | 3218 (242)                            | NH <sub>3</sub> $\sigma_s$                                                                                                    |
| 3308                     | 3280 (32)                             | 3272 (21)                             | 3238 (204)                            | -                                     | NH <sub>3</sub> $\sigma_s$                                                                                                    |
| -                        | 3284 (49)                             | -                                     | 3276 (28)                             | -                                     | NH <sub>3</sub> $\sigma_s$                                                                                                    |
| -                        | 3295 (51)                             | -                                     | -                                     | -                                     | NH <sub>2</sub> $\sigma_a$                                                                                                    |
| -                        | -                                     | 3316 (94)                             | -                                     | 3323 (135)                            | NH <sub>3</sub> $\sigma_a$                                                                                                    |
| 3378                     | -                                     | -                                     | 3310 (113)                            | -                                     | NH <sub>3</sub> $\sigma_s$                                                                                                    |
| -                        | -                                     | -                                     | 3329 (112)                            | -                                     | NH <sub>2</sub> $\sigma_a$                                                                                                    |
| -                        | 3330 (111)                            | 3332 (40)                             | 3353 (65)                             | -                                     | NH <sub>3</sub> $\sigma_a$                                                                                                    |
| -                        | 3342 (115)                            | -                                     | 3344 (49)                             | 3343 (43)                             | NH <sub>3</sub> $\sigma_a$                                                                                                    |
| -                        | 3346 (106)                            | 3361 (46)                             | -                                     | 3356 (49)                             | NH <sub>3</sub> $\sigma_a$                                                                                                    |
| -                        | -                                     | -                                     | 3346 (30)                             | -                                     | NH <sub>2</sub> $\sigma_a$                                                                                                    |
| -                        | -                                     | 3373 (38)                             | -                                     | 3382 (39)                             | NH <sub>3</sub> $\sigma_a$                                                                                                    |
| 3434                     | -                                     | 3426 (24)                             | -                                     | 3433 (14)                             | NH <sub>2</sub> $\sigma_a$                                                                                                    |
| 3570                     | 3528 (157)                            | -                                     | 3525 (156)                            | 3556 (99)                             | O-H $\sigma$                                                                                                                  |

<sup>a</sup> Wavenumbers in cm<sup>-1</sup>.

<sup>b</sup> Calculated harmonic IR intensities are given in parentheses (km mol<sup>-1</sup>). Transitions with intensity lower than 20 km mol<sup>-1</sup> are (usually) not reported. Frequencies (anharmonic) are not scaled.

<sup>c</sup>s, shoulder.

<sup>d</sup>  $\sigma$  = stretching mode;  $\sigma_a$  = asymmetric stretching;  $\sigma_s$  = symmetric stretching;  $\beta$  = bending mode;  $\beta_s$  = scissoring (symmetric bending in plane);  $\beta_w$  = wagging (symmetric bending out of plane),  $\beta_t$  = twisting (asymmetric bending out of plane).

Table S3. Theoretically calculated thermodynamic parameters for the most stable structures of sampled  $[\text{PtCl}(\text{NH}_3)_2\text{Met}]^+$  complexes.

| <i>cis</i> - $[\text{PtCl}(\text{NH}_3)_2\text{Met}]^+$ |                                 |                                 |
|---------------------------------------------------------|---------------------------------|---------------------------------|
| conformer                                               | $\Delta\text{G}(\text{KJ/mol})$ | $\Delta\text{H}(\text{KJ/mol})$ |
| cS1                                                     | 0.0                             | 0.0                             |
| cS2                                                     | 3.8                             | 5.9                             |
| cS3                                                     | 8.9                             | 13.6                            |
| cS4                                                     | 13.5                            | 11.4                            |
| cS5                                                     | 15.7                            | 18.4                            |
| cN1                                                     | 17.7                            | 24.8                            |
| cS6                                                     | 18.4                            | 29.5                            |
| cS7                                                     | 18.8                            | 24.0                            |
| cS8                                                     | 18.9                            | 32.0                            |
| cS9                                                     | 20.1                            | 23.7                            |
| cN2                                                     | 20.3                            | 24.2                            |
| cS10                                                    | 20.8                            | 32.2                            |
| cN3                                                     | 22.1                            | 27.6                            |
| cN4                                                     | 23.9                            | 22.4                            |
| cS11                                                    | 24.8                            | 35.2                            |
| cS12                                                    | 32.4                            | 37.9                            |
| cS13                                                    | 33.2                            | 39.9                            |
| cN5                                                     | 42.3                            | 48.7                            |
| cN6                                                     | 46.1                            | 53.2                            |
| cS14                                                    | 53.3                            | 61.3                            |
| cO1                                                     | 126.5                           | 136.9                           |

  

| <i>trans</i> - $[\text{PtCl}(\text{NH}_3)_2\text{Met}]^+$ |                                 |                                 |
|-----------------------------------------------------------|---------------------------------|---------------------------------|
| conformer                                                 | $\Delta\text{G}(\text{KJ/mol})$ | $\Delta\text{H}(\text{KJ/mol})$ |
| tN1                                                       | 0.0                             | 2.0                             |
| tS1                                                       | 1.2                             | 0.0                             |
| tN2                                                       | 5.9                             | 6.3                             |
| tN3                                                       | 11.9                            | 15.0                            |
| tS2                                                       | 13.5                            | 19.5                            |
| tS3                                                       | 20.7                            | 25.2                            |
| tN4                                                       | 25.3                            | 25.6                            |
| tS4                                                       | 30.0                            | 33.6                            |
| tS5                                                       | 41.5                            | 44.7                            |
| tN5                                                       | 55.8                            | 61.1                            |
